# Supplementary material
Source: PubMed Central journal article supplement (PMC2976381)
Supplement: supp_30_22_5364__1.pdf [file supp_30_22_5364__1.pdf]

1 **Table S1:** A list of all loci bound by Sall4a. Peaks also bound by BirA were removed.  
2 Also, loci that did not map to a well-annotated locus were removed. Genomic  
3 coordinates are for mm8.

4  
5 **Table S2:** A list of all loci bound by Sall4b. Peaks also bound by BirA were removed.  
6 Also, loci that did not map to a well-annotated locus were removed. Genomic  
7 coordinates are for mm8.

8
